# Supplementary material for: Kinetoplastid Species Maintained by a Small Mammal Community in the Pantanal Biome
Source: MDPI journal article supplement (doi:10.3390/pathogens11101205), 2022-10-19
Supplement: s1 [file s1]

Table S1. Sequencing data quality for the analyzed samples expressed by: input — number of reads in raw fastq files; filtered — number of reads after preliminary quality filtering; denoised (F/R) — number of reads after quality filtering; merged — number of merged forward-reverse reads; nonchim — number of merged reads after removal of chimera sequences; % passed — relative number of passed reads after all the above steps.

| <b>Host</b>                  | <b>Input</b> | <b>Filtered</b> | <b>Denoised F</b> | <b>Denoised R</b> | <b>Merged</b> | <b>Nonchim</b> | <b>% passed</b> |
|------------------------------|--------------|-----------------|-------------------|-------------------|---------------|----------------|-----------------|
| <i>Monodelphis domestica</i> | 35704        | 27750           | 27657             | 27656             | 27594         | 27445          | 99.46%          |
| <i>Thylamys macrurus</i>     | 73610        | 67151           | 66772             | 66936             | 65233         | 61250          | 93.89%          |
| <i>Oecomys mamorae</i>       | 146617       | 123626          | 123201            | 123124            | 121734        | 120501         | 98.99%          |
| <i>Thrichomys fosteri</i>    | 39032        | 28847           | 28758             | 28726             | 28585         | 28559          | 99.91%          |
| <i>Clyomys laticeps</i>      | 70233        | 59959           | 59868             | 59873             | 59779         | 59468          | 99.48%          |
| <i>Holochilus chacaris</i>   | 52097        | 47846           | 47779             | 47818             | 47662         | 47662          | 100.00%         |
